# Supplementary material for: Trends and Patterns in Electronic Health Record Research (1991–2022): A Bibliometric Analysis of Australian Literature
Source: MDPI journal article supplement (doi:10.3390/ijerph21030361), 2024-03-19

**Figure S1: Identification and selection of articles for bibliometric analysis**

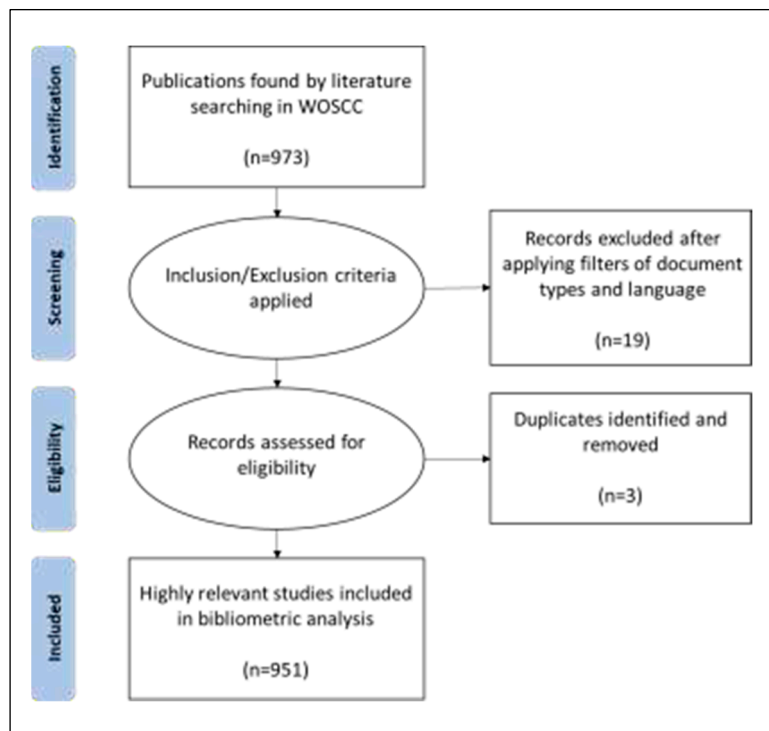

**Figure S2: Most relevant authors, affiliations, sources and locally cited sources**

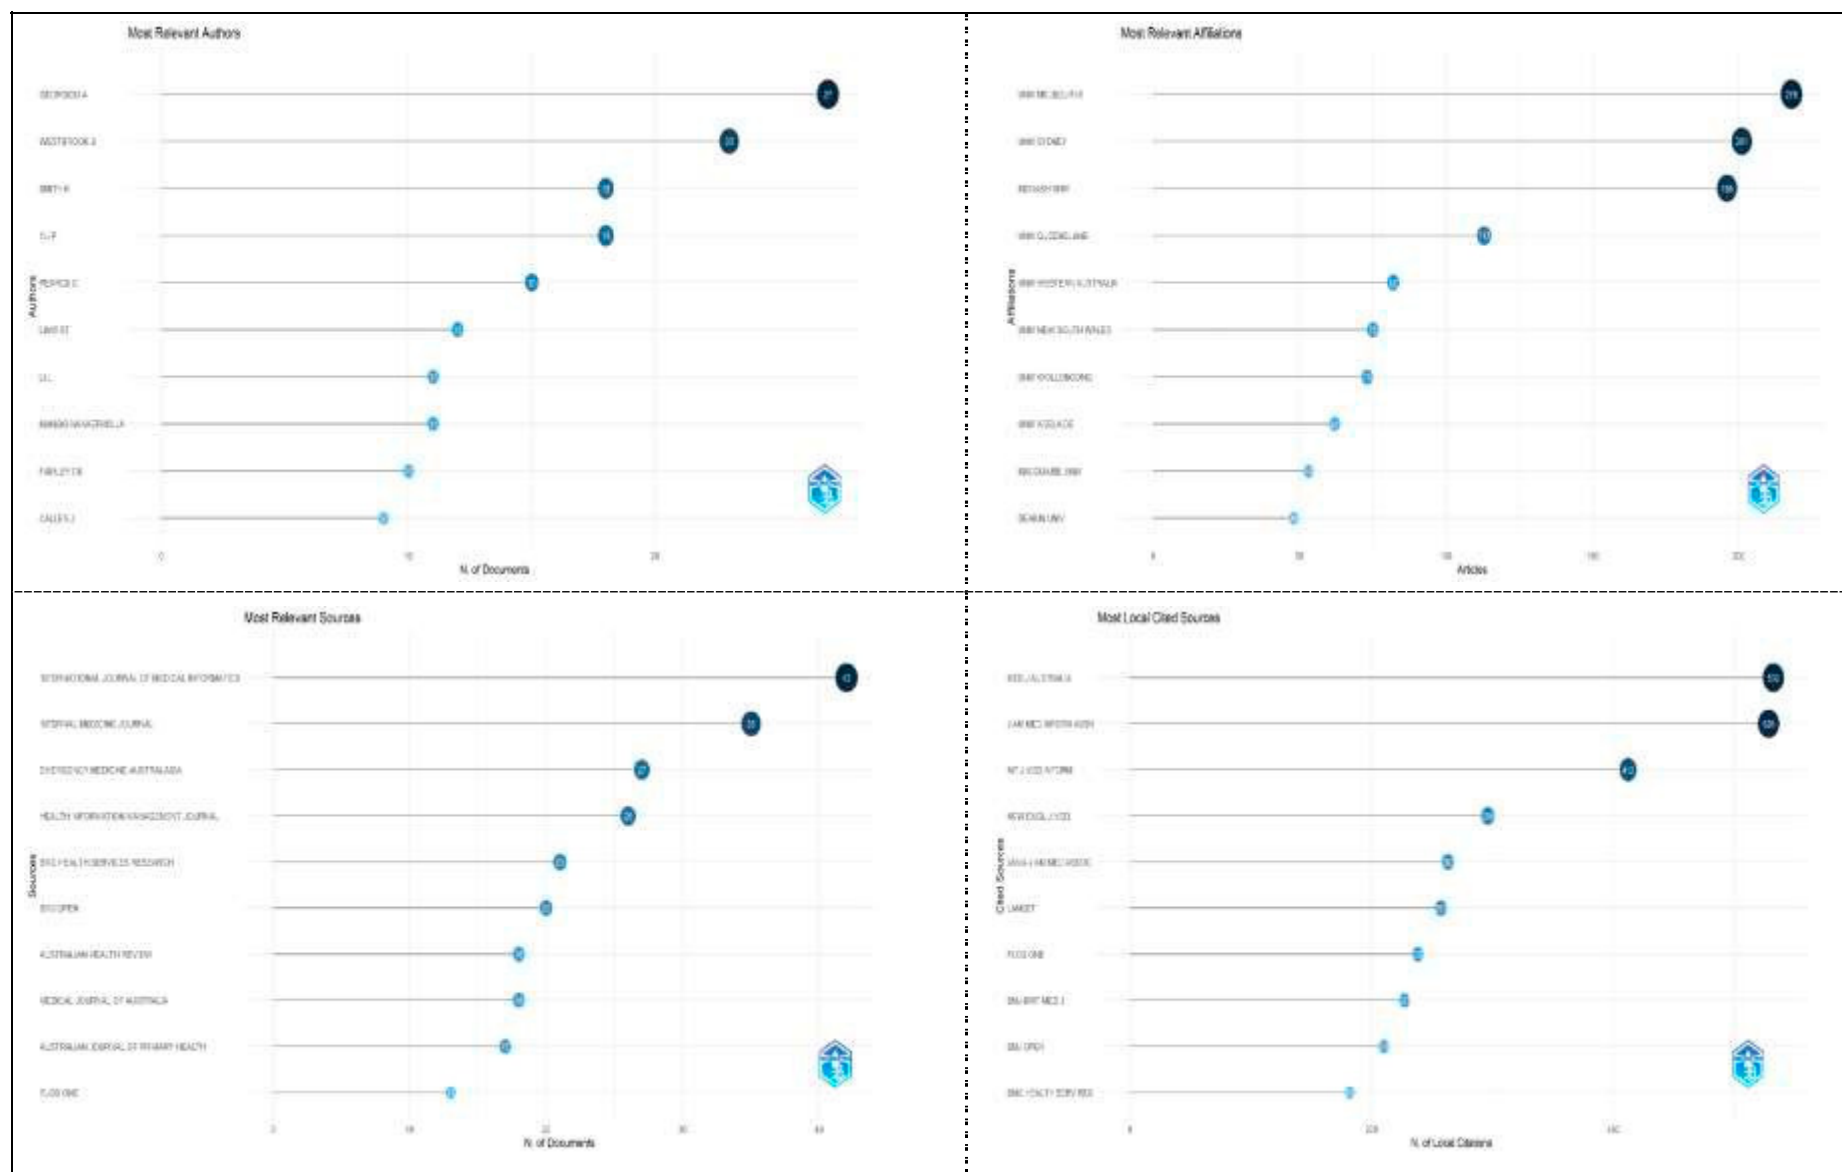

**Figure S3: Tree map on most used words on EHR research in Australia**

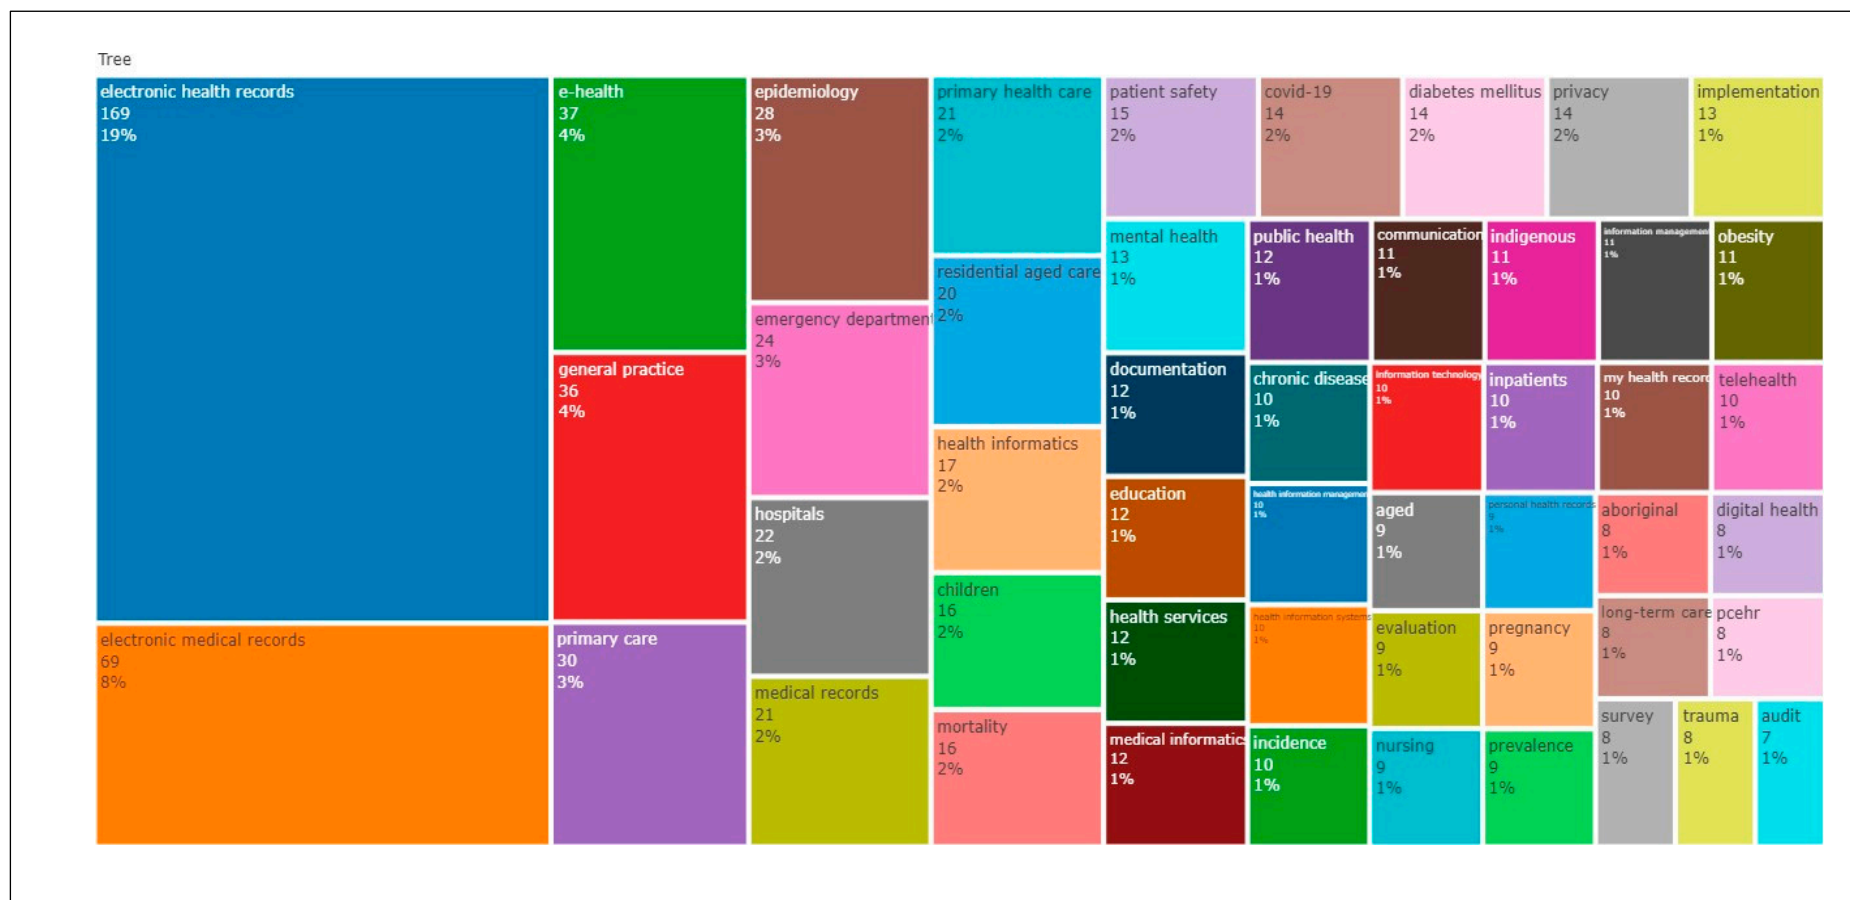

Supplement: s1 [file s1]
